# Supplementary material
Source: PubMed Central journal article supplement (PMC3012743)
Supplement: NIHMS239859-supplement-Supplementary_data.pdf [file NIHMS239859-supplement-Supplementary_data.pdf]

Supplemental Table 1. qRT-PCR Expression of 45 Genes : Mybl2 siRNA or Spontaneous Differentiation

| Gene               | Expression Relative to GAPDH (x100) |             |        |              |               | Gene                | Expression Relative to GAPDH (x100) |             |        |              |               |
|--------------------|-------------------------------------|-------------|--------|--------------|---------------|---------------------|-------------------------------------|-------------|--------|--------------|---------------|
|                    | NT siRNA                            | Mybl2 siRNA | Prolif | Spont. Day 2 | Spont. Day 14 |                     | NT siRNA                            | Mybl2 siRNA | Prolif | Spont. Day 2 | Spont. Day 14 |
| <b>ALDH7</b>       | 0.880                               | 1.359       | 1.002  | 1.662        | 1.627         | <b>endothelin</b>   | 0.061                               | 0.073       | 0.147  | 0.058        | 0.185         |
| <b>ALPi</b>        | 0.072                               | 0.056       | 0.065  | 0.183        | 0.762         | <b>EPHX2</b>        | 0.131                               | 0.124       | 0.128  | 0.948        | 2.798         |
| <b>E-cadherin</b>  | 7.439                               | 8.175       | 7.352  | 13.605       | 29.126        | <b>fibronectin</b>  | 26.905                              | 26.796      | 32.745 | 67.122       | 17.820        |
| <b>cathepsin B</b> | 1.131                               | 1.161       | 1.133  | 2.536        | 9.626         | <b>GSPT1</b>        | 0.349                               | 0.504       | 0.411  | 0.127        | 0.154         |
| <b>cdk2</b>        | 0.406                               | 0.706       | 0.889  | 1.002        | 0.991         | <b>GSTA3</b>        | 0.002                               | 0.001       | 0.000  | 0.007        | 0.326         |
| <b>cdk4</b>        | 2.381                               | 2.429       | 5.145  | 6.819        | 4.546         | <b>HAT1</b>         | 0.169                               | 0.214       | 0.097  | 0.091        | 0.077         |
| <b>cyclin A2</b>   | 4.243                               | 3.269       | 2.636  | 2.075        | 0.979         | <b>HDAC2</b>        | 1.043                               | 1.375       | 0.647  | 0.848        | 0.501         |
| <b>cyclin B1</b>   | 0.101                               | 0.069       | 0.226  | 0.239        | 0.046         | <b>eIF-4E</b>       | 0.050                               | 0.064       | 0.044  | 0.059        | 0.038         |
| <b>cyclin B2</b>   | 1.522                               | 1.099       | 1.244  | 1.458        | 0.537         | <b>Id-2</b>         | 2.149                               | 2.056       | 2.540  | 2.763        | 14.940        |
| <b>cyclin D1</b>   | 2.309                               | 3.177       | 4.179  | 3.335        | 2.997         | <b>α-5 integrin</b> | 0.003                               | 0.003       | 0.007  | 0.014        | 0.109         |
| <b>cyclin D2</b>   | 11.264                              | 18.102      | 18.157 | 4.446        | 1.408         | <b>KLF4</b>         | 0.025                               | 0.027       | 0.027  | 0.144        | 0.537         |
| <b>cyclin E1</b>   | 0.004                               | 0.004       | 0.003  | 0.003        | 0.002         | <b>MEK2</b>         | 0.269                               | 0.325       | 0.488  | 0.635        | 1.129         |
| <b>cdc2</b>        | 4.669                               | 3.226       | 3.735  | 3.504        | 1.557         | <b>Mybl2</b>        | 3.189                               | 0.537       | 5.484  | 4.924        | 1.998         |
| <b>cdc25A</b>      | 1.095                               | 1.282       | 1.133  | 0.740        | 0.404         | <b>c-myc</b>        | 0.012                               | 0.019       | 0.066  | 0.091        | 0.026         |
| <b>cdc25B</b>      | 0.750                               | 0.494       | 0.820  | 1.336        | 0.710         | <b>NAP1L1</b>       | 24.987                              | 29.340      | 30.119 | 66.704       | 28.832        |
| <b>cdc25C</b>      | 0.666                               | 0.453       | 0.602  | 1.037        | 0.646         | <b>Notch1</b>       | 0.015                               | 0.014       | 0.016  | 0.051        | 0.043         |
| <b>cycloph G</b>   | 0.013                               | 0.017       | 0.005  | 0.008        | 0.013         | <b>PCNA</b>         | 9.654                               | 11.627      | 13.505 | 13.143       | 6.295         |
| <b>CYP1A1</b>      | 1.675                               | 1.504       | 1.790  | 1.218        | 0.552         | <b>PSMC3</b>        | 0.622                               | 0.773       | 0.700  | 0.597        | 0.765         |
| <b>DNA topo</b>    | 0.338                               | 0.372       | 0.289  | 0.213        | 0.321         | <b>Ran</b>          | 1.644                               | 1.785       | 0.378  | 0.568        | 0.267         |
| <b>DP-1</b>        | 0.037                               | 0.051       | 0.064  | 0.042        | 0.030         | <b>TARS</b>         | 0.076                               | 0.068       | 0.172  | 0.108        | 0.063         |
| <b>DPPIV</b>       | 1.615                               | 1.519       | 2.210  | 9.380        | 12.504        | <b>TCF-4</b>        | 0.182                               | 0.158       | 0.148  | 0.418        | 1.179         |
| <b>E2M</b>         | 0.160                               | 0.175       | 0.058  | 0.050        | 0.020         | <b>TGF-b2</b>       | 0.087                               | 0.078       | 0.062  | 0.075        | 0.013         |
|                    |                                     |             |        |              |               | <b>thy synth</b>    | 1.526                               | 1.798       | 1.514  | 1.470        | 1.256         |

# Supplemental Table 2. Primers used for qRT-PCR

| Gene               | forward primer (5'→3')    | reverse primer (5'→3')  | Gene               | forward primer (5'→3')    | reverse primer (5'→3')   |
|--------------------|---------------------------|-------------------------|--------------------|---------------------------|--------------------------|
| <b>ALDH7</b>       | GAGGCGACTGTTTATACATG      | AAGAAACATGCTCACTGCCT    | <b>fibronectin</b> | ACGCCTCCACTGCCATTGAT      | AGACCCAGGCTTCTCATACT     |
| <b>ALPi</b>        | GCAACCCTGCAACCCACCCAAGGAG | CCAGCATCCAGATGTCCCGGGAG | <b>GAPDH</b>       | CCATCAATGACCCCTTCATT      | TTGATGACAAGCTTCCCGTT     |
| <b>A-myb</b>       | ACCTTGTGCAGCTATGGATC      | GTGACACATACTGATACCCA    | <b>GSPT1</b>       | TCAGGAAGAACGAGACAAGG      | TGAGATTACCAGCACAGCCA     |
| <b>E-cadherin</b>  | TGAAGGTGACAGAGCCTCTGGAT   | TGGGTGAATTCGGGCTTGTT    | <b>GSTA3</b>       | TTCAATGGACGGGGCAGAAT      | CCAACTTCATCCCATCAATC     |
| <b>cathepsin B</b> | AGCACTACGGATAACAATTCC     | ACTTGTAGAGCAGGAAGTCC    | <b>HAT1</b>        | GTAGGCTACATGACAGTCTA      | CCTTGACCTTGAAATGGAGT     |
| <b>cdk2</b>        | GCTAGCAGACTTTGGACTAGCCAG  | AGCTCGGTACCACAGGGTCA    | <b>HDAC2</b>       | CGTGTAATGACGGTATCATTCC    | CTGCCCATATGACTCATCATC    |
| <b>cdk4</b>        | ATGTTGTCCGGCTGATGGA       | CACCAGGGTTACCTTGATCTCC  | <b>eIF-4E</b>      | GTTTGTGCGATCAGATCGAT      | TTCTCCTCTTCTGTAGTCGG     |
| <b>cycl A2</b>     | TGCTGCTATGCTGTTAGCCT      | TGCTCCATTCTCAGAACTTG    | <b>Id-2</b>        | CATCCTGTCTTGCAGGCTT       | CACACAGTGCTTTGCTGTCA     |
| <b>cycl B1</b>     | TGCTGCCTGGTGAAGAGGAA      | TGCCATGTTGATCTTCGCTT    | <b>α-5 integr</b>  | CTCCATTGGTTTTACAGTGG      | ATTCTGGATGAGCAGGGTCT     |
| <b>cycl B2</b>     | CTTCTGTCAAACCACTACAG      | ATTTTGCAGAGCAAGGCATC    | <b>KLF4</b>        | TGCTGATTGTCTATTTTTGCGTTTA | GAGAAGAAACGAAGCCAAAACC   |
| <b>cycl D1</b>     | ATGCTGGAGGTCTGCGAGGA      | AGGAAGCGGTCCAGGTAGTT    | <b>MEK2</b>        | TGCTCACAAACCACACCTTCAT    | ACACAACCAGCCGGCAAA       |
| <b>cycl D2</b>     | GAAGGACATCCAACCCTACA      | AGGAGTTGCAGATGGGACTT    | <b>Mybl2</b>       | CTGACCAGCAATGCCAGTAC      | TTCAGGTGCTTGGCAATCAG     |
| <b>cycl E1</b>     | CTCCAGGAAGAGGAAGGCAA      | TCGATTTTGCCATTTCTTCA    | <b>c-myb</b>       | TCGCAAAGCTACTGCCTGGA      | AAGACTCTGCAGATAACCT      |
| <b>cdc2</b>        | TCCTGGTCAGTACATGGATT      | GTCTCTGTGAAGAACTCTTC    | <b>c-myc</b>       | TGCCAGGACCCGCTTCT         | GAGGCTGCTGGTTTTCCAATA    |
| <b>cdc25A</b>      | CTCCGAGTCAACAGATTTCAG     | CTACATCCCAACAGCTTCTG    | <b>NAP1L1</b>      | CACGTCAGCTAACTGTTTCAG     | ACCCTAGGCAGGCTTTCAAT     |
| <b>cdc25B</b>      | TCGTCTGAATCCTCCGAATC      | CATAGACTGGAAGCGTCTGA    | <b>Notch1</b>      | CAGGCAATCCGAGGACTATG      | CAGGCGTGTGTCTCTCACAG     |
| <b>cdc25C</b>      | TATCACTCAGATGCTGGAGG      | TCTGGGTTGACATACTTCAG    | <b>PCNA</b>        | GACCGCAACCTGGCCAT         | CCGCGTTATCTTCGGCC        |
| <b>cycloph G</b>   | CTTTGTACAGGTGAAAAGGG      | CTTCACTGAAGTCACCACCT    | <b>PSMC3</b>       | GTACAGAAATACGTCCGGTGA     | GTCACCTCCAGCACCATCAT     |
| <b>CYP1A1</b>      | TACCCAACCCTTCCCTGAAT      | AGTGCTCAATCAGGCTGTCT    | <b>Ran</b>         | TTATATCCAAGCCAGTGTG       | ACAATGGATTTCGCCTTCAC     |
| <b>DNA topo</b>    | GGAACCAGTATCGAGAAGAC      | CTCCTTTTCATTTGCTGCTC    | <b>TARS</b>        | CAGTCTATAGATGTGGCCCT      | TCTCCATATCTGCTTTGCCT     |
| <b>DP-1</b>        | TTCCGACTCCTCACCTTGGT      | TAGGCCCTTGCCATTCTTCT    | <b>TCF-4</b>       | CCGAAAGTTTCCGAGACAAA      | AGTGGCCATTTTCATCTGGAG    |
| <b>DPPIV</b>       | AGTCTTCAGTGCCTACTCTG      | CAGTTGGATTTCACAGCTCCT   | <b>TGF-b2</b>      | AATAGACATGCCGCCCTTCT      | TCTCCATTGCTGAGACGTCA     |
| <b>E2M</b>         | CAGAAGGACATAAACGAGCT      | TTGAAGTTGAGGAGGTCGTC    | <b>thy synth</b>   | ACTGCAAAGAGTGATTGACACCAT  | CAGAGGAAGATCTCTTGATTCCAA |
| <b>endothelin</b>  | AGCTCCAGAAAACAGCAGTCT     | TTATCCATCAGGGACGAGCA    |                    |                           |                          |
| <b>EPHX2</b>       | CCACTACCCGGCTTATGAAA      | TTAGCGGTCTCGGAGCACTT    |                    |                           |                          |

Supplemental Table 2 (continued). Primers used for chromatin immunoprecipitation

| <b>Gene</b>       | <b>forward primer (5'→3')</b> | <b>reverse primer (5'→3')</b> |
|-------------------|-------------------------------|-------------------------------|
| <b>E-cadherin</b> | AGTGGAAATCAGAACCGTGCA         | CTGCCGGCCACAGCCAATCA          |
| <b>cdk2</b>       | CACTCTCATCTTGATGCACT          | CTGGTTTAATTCACTCTCCC          |
| <b>cdk4</b>       | CTCATGGTGGAGCGAAAAGG          | CTGAAGGATTGTCTCACTAC          |
| <b>cdc25B</b>     | GTGGCTTTACAAGGACTT            | CTCTGCAAGACTGAATTTCC          |
| <b>c-myc</b>      | CACTTAACACTTGAACGCTG          | GTGTATAGCATGTACGCTGT          |
| <b>cyclin B2</b>  | TCAGAGGCGTCTTACGTCTG          | AGATGCACTCTCGCACTCTC          |
| <b>cyclin D2</b>  | CTACACCTACAGAATGAGTG          | ACTACCGACTCCTATTTCTG          |
| <b>MEK2</b>       | GTGGATCTAACACAGCTACA          | ATGAGTAGGATCACACAGGT          |

## Supplementary Experimental Procedures

### *Reporter plasmids*

A plasmid containing -2.4 kbp of promoter region of the human *CDK2* gene up to nucleotide +58 bp cloned into pGL2 Basic (Promega) (1) was a gift of A. van Wijnen (University of Massachusetts Medical School, Worcester, MA). A 3.3kb fragment of the human c-myc promoter, containing residues -2328 bp to +936 bp relative to transcription initiation site P1, inserted upstream of a luciferase reporter (2) was a gift of D. Levins (Laboratory of Pathology, National Cancer Institute, Bethesda, MD). The upstream regions of *cdk6*, cyclin D2, *cdc25B*, and cyclin B2 were cloned by PCR from genomic DNA of Caco-2 cells as follows : ~250ng genomic DNA, isolated from ~3x10<sup>6</sup> Caco-2 cells using the Dneasy Blood and Tissue kit (Qiagen) as described by the manufacturer, was amplified by PCR using Phusion High Fidelity DNA polymerase (New England Biolabs) and the following primers : *cdk6* (-1004bp to +172bp, relative to start site of longest transcript (3)) 5' **ggggtacc**ctttgtgtgcagagggctc, 3' *gaagatcta*atcagacagcccagaagcc ; cyclin D2 (-881bp to +147bp relative to start site of longest transcript (4)) 5' **ggggtacca**gcggttttctcgtg, 3' *gaagatctg*acctccttcttgctga ; *cdc25B* (-1328bp to +559 relative to start site of longest transcript, Genbank accession NM\_021873) 5' **ggggtacc**acatacaccctgtgcagatg, 3' *gaagatctt*ctagttgcagctgccact ; cyclin B2 (-797bp to +94 bp relative to transcriptional start site, Genbank accession NM\_004701) 5' **ggggtacc**gattctggacactaggcctt, 3' *gaagatcta*aagggaggacactagcgta. Sequences in bold and italics represent, respectively, sites for cleavage by KpnI and BglII restriction endonucleases. Cycling conditions : 98° for 30 s ; 30 cycles of 98° for 10 s, 65° (*cdk6*, cyclin D2, cyclin B2) or 72° (*cdc25B*) for 30 s, 72° for 45 s (*cdk6*, cyclin B2, cyclin D2) or 2 min (*cdc25B*); 72° for 10 min. Appropriately-sized fragments were purified (Gel Extraction Kit, Qiagen) and digested overnight with KpnI and BglII, then ligated into similarly-digested pGL3 Basic (Promega).

## Supplementary Experimental Procedures References

1. Shiffman, D., Brooks, E. E., Brooks, A. R., Chan, C. S., and Milner, P. G. (1996) *J Biol Chem* **271**, 12199-12204
2. Chung, H. J., Liu, J., Dundr, M., Nie, Z., Sanford, S., and Levins, D. (2006) *Mol Cell Biol* **26**, 6584-6597
3. Iwanaga, R., Ozono, E., Fujisawa, J., Ikeda, M. A., Okamura, N., Huang, Y., and Ohtani, K. (2008) *Oncogene*
4. Brooks, A. R., Shiffman, D., Chan, C. S., Brooks, E. E., and Milner, P. G. (1996) *J Biol Chem* **271**, 9090-9099
